# Supplementary material for: A Scoping Review of How Income Affects Accessing Local Green Space to Engage in Outdoor Physical Activity to Improve Well-Being: Implications for Post-COVID-19
Source: MDPI journal article supplement (doi:10.3390/ijerph17249313), 2020-12-12
Supplement: s1 [file s1]

Supplementary File - 15 included income papers:

|     | <b>Author and date</b>      | <b>Study title</b>                                                                                                                                                                              | <b>Theme</b>                                      |
|-----|-----------------------------|-------------------------------------------------------------------------------------------------------------------------------------------------------------------------------------------------|---------------------------------------------------|
| 1.  | Ahuja et al., 2018          | Examining relationships between perceptions and objective assessments of neighborhood environment and sedentary time: Data from the Washington, D.C. Cardiovascular Health and Needs Assessment | Environment and well-being                        |
| 2.  | Boone-Heinonen et al., 2010 | Residential self-selection bias in the estimation of built environment effects on physical activity between adolescence and young adulthood                                                     | Environment and well-being                        |
| 3.  | Cerin et al., 2009          | Explaining socio-economic status differences in walking for transport: An ecological analysis of individual, social and environmental factors                                                   | Environment and well-being                        |
| 4.  | Cleland et al., 2010        | Individual, social and environmental correlates of physical activity among women living in socioeconomically disadvantaged neighbourhoods                                                       | Physical activity and income/socioeconomic status |
| 5.  | Cohen-Cline et al., 2015    | Access to green space, physical activity and mental health: a twin study                                                                                                                        | Physical activity and income/socioeconomic status |
| 6.  | Haughton et al., 2006       | Individual, social environmental, and physical environmental influences on physical activity among black and white adults: a structural equation analysis.                                      | Environment and well-being                        |
| 7.  | Kerr et al., 2014           | Neighborhood Environment and Physical Activity among Older Women: Findings from the San Diego Cohort of the Women's Health Initiative                                                           | Environment and well-being                        |
| 8.  | Kim and Yang, 2017          | Neighborhood walking and social capital: The correlation between walking experience and individual perception of social capital                                                                 | Environment and well-being                        |
| 9.  | Lee, 2007                   | Environment and active living: The roles of health risk and economic factors.                                                                                                                   | Physical activity and income/socioeconomic status |
| 10. | Maas et al., 2008           | Physical activity as a possible mechanism behind the relationship between green space and health: A multilevel analysis                                                                         | Physical activity and income/socioeconomic status |

|     | <b>Author and date</b>   | <b>Study title</b>                                                                                                                                   | <b>Theme</b>                                      |
|-----|--------------------------|------------------------------------------------------------------------------------------------------------------------------------------------------|---------------------------------------------------|
| 11. | Mytton et al, 2012       | Green space and physical activity: An observational study using Health Survey for England data                                                       | Physical activity and income/socioeconomic status |
| 12. | Niedermeier et al., 2017 | Prevalence of mental health problems and factors associated with psychological distress in mountain exercisers: A cross-sectional study in Austria   | Environment and well-being                        |
| 13. | Prince et al., 2011      | A Multilevel Analysis of Neighbourhood Built and Social Environments and Adult Self-Reported Physical Activity and Body Mass Index in Ottawa, Canada | Environment and well-being                        |
| 14. | Shin et al., 2011        | The distance effects of environmental variables on older African American women's physical activity in Texas                                         | Environment and well-being                        |
| 15. | Tomita et al., 2017      | Green environment and incident depression in South Africa: a geospatial analysis and mental health implications in a resource-limited setting        | Environment and well-being                        |
